# Supplementary material for: Investigation of the Relationship between Cardiovascular Biomarkers and Brachial–Ankle Pulse Wave Velocity in Hemodialysis Patients
Source: MDPI journal article supplement (doi:10.3390/jpm12040636), 2022-04-15
Supplement: s1 [file s1]

**Supplementary Table S1.** List of cardiovascular biomarkers measured in this study.

| Platform            | Catalog No.           | UniProt ID | Protein Analyte             | Units |
|---------------------|-----------------------|------------|-----------------------------|-------|
| Roche Diagnostics   | cobas® e 411 analyzer | P45379     | High sensitivity Troponin T | ng/mL |
| Roche Diagnostics   | cobas® e 411 analyzer | P16860     | NT-proBNP                   | pg/mL |
| MILLIPLEX® map Kits | HCVD1MAG-67K          | Q9NQ30     | Endocan-1                   | pg/mL |
| MILLIPLEX® map Kits | HCVD1MAG-67K          | Q53XY6     | Placental Growth Factor     | pg/mL |
| MILLIPLEX® map Kits | HCVD3MAG-67K          | P02765     | Fetuin-A                    | ng/mL |
| MILLIPLEX® map Kits | HCCBP3MAG-58K         | P17931     | Galectin-3                  | ng/mL |
| MILLIPLEX® map Kits | HCCBP3MAG-58K         | P0733      | Cathepsin D                 | ng/mL |

Abbreviation: NT-proBNP, N-terminal pro-brain natriuretic peptide

**Supplementary Table S2.** The relationship between log-transformed brachial-ankle pulse wave velocity and clinical parameters and biochemical blood profiles in the simple linear regression model.

| Characteristics                             | $\beta$ (95%CI)          | <i>p</i> -value |
|---------------------------------------------|--------------------------|-----------------|
| Age (y old)                                 | 0.01 (0.003, 0.01)       | <0.01           |
| Men (%)                                     | 0.1 (−0.01, 0.1)         | 0.1             |
| Smoking history (%)                         | 0.1 (−0.02, 0.1)         | 0.1             |
| Body mass index (Kg/m <sup>2</sup> )        | −0.01 (−0.02, 0.01)      | 0.4             |
| Systolic blood pressure (mmHg)              | 0.004 (0.003, 0.01)      | <0.01           |
| Diastolic blood pressure (mmHg)             | 0.01 (0.003, 0.01)       | <0.01           |
| Hemodialysis vintage (mo)                   | −0.001 (−0.001, −0.0001) | 0.03            |
| Arteriovenous shunt                         |                          |                 |
| Arteriovenous fistula                       | −0.1 (−0.2, 0.1)         | 0.2             |
| Arteriovenous graft                         | Reference group          |                 |
| Cause of end-stage kidney disease           |                          |                 |
| Hypertension                                | −0.1 (−0.2, 0.1)         | 0.3             |
| Diabetes Mellitus                           | 0.2 (0.1, 0.2)           | <0.01           |
| Glomerulonephritis                          | −0.1 (−0.2, −0.03)       | <0.01           |
| Others*                                     | Reference group          |                 |
| Comorbidities                               |                          |                 |
| Diabetes mellitus (%)                       | 0.2 (0.1, 0.2)           | <0.01           |
| Hypertension (%)                            | 0.1 (0.04, 0.2)          | <0.01           |
| Hyperlipidemia (%)                          | 0.1 (−0.03, 0.1)         | 0.2             |
| Coronary artery disease (%)                 | 0.1 (−0.02, 0.2)         | 0.1             |
| Cerebrovascular disease (%)                 | 0.1 (−0.1, 0.2)          | 0.3             |
| Clinical laboratory data                    |                          |                 |
| Hemoglobin (mg/dL)                          | 0.01 (−0.02, 0.03)       | 0.8             |
| Albumin (mg/dL)                             | −0.2 (−0.3, −0.1)        | <0.01           |
| Low density lipoprotein cholesterol (mg/dL) | −0.001 (−0.002, 0.0001)  | 0.2             |
| Ion Calcium (mg/dL)                         | −0.1 (−0.2, −0.02)       | 0.02            |
| Phosphate (mg/dL)                           | −0.02 (−0.1, 0.02)       | 0.4             |
| C-reactive protein (mg/L)                   | 0.1 (0.02, 0.1)          | <0.01           |
| Dialysis dose, Single pool Kt/V             | −0.03 (−0.2, 0.1)        | 0.7             |

Abbreviation: Kg, kilogram; mmHg, millimeter(s) of mercury; mg, milligram; dL, deciliter; L, liter; Kt/V, dialyzer clearance of urea  $\times$  dialysis time/volume of distribution of urea; ng, nanogram; mL, milliliter; pg, picogram.

\*Other causes of end-stage renal disease include polycystic kidney disease, tumor, systemic lupus erythematosus, gout, interstitial nephritis

**Supplementary Table S3.** Association between circulating CV biomarker levels (log-transformed) and brachial-ankle pulse wave velocity (log-transformed) in hemodialysis participants using the multivariable-adjusted linear regression model with stepwise procedure selected covariates.

| Cardiovascular markers | Adjusted models*   | <i>p</i> -value |
|------------------------|--------------------|-----------------|
| hsTnT                  | 0.1 (0.1, 0.2)     | <0.01           |
| NT-proBNP              | 0.01 (−0.02, 0.04) | 0.4             |
| Galectin-3             | 0.1 (−0.02, 0.2)   | 0.1             |
| Cathepsin D            | 0.1 (0.01, 0.1)    | 0.01            |

Abbreviation: hsTnT, high sensitivity troponin T; NT-proBNP, N-terminal pro-brain natriuretic peptide. \* Multivariable linear model demonstrated as a  $\beta$  with 95% CIs. The multivariable linear regression is adjusted for stepwise procedure selected covariates in the final model as follows: hsTnT covariates selection is age, diastolic blood pressure, and blood level of ion Calcium; NT-proBNP covariates selection is age, diastolic blood pressure, diabetes mellitus, and blood level of low-density lipoprotein and C-reactive protein; Galectin 3 covariates selection is age, body mass index, systolic blood pressure, diabetes mellitus, and blood level of ion calcium and C-reactive protein; Cathepsin D covariates selection is age, body mass index, systolic blood pressure, diabetes mellitus, and blood level of ion calcium and C-reactive protein.
